# Supplementary material for: The Evolution of Fungal Metabolic Pathways
Source: PLoS Genet. 2014 Dec 4;10(12):e1004816. doi: 10.1371/journal.pgen.1004816 (PMC4256263; doi:10.1371/journal.pgen.1004816)
Supplement: Table S6 — Fisher's exact tests for association between sources of gene innovation (i.e., GD or HGT) and gene clustering. (XLSX) [file pgen.1004816.s010.xlsx]

## Sheet: Table S6
Table S6 Fisher's exact test for association between sources of gene innovation (i.e., GD or HGT) and gene clustering
Lineage	ECgene subset	No. clustered and in subset	No. non-clustered and in subset	No. clustered and not in subset	No. non-clustered and not subset	No. clustered and in subset over total clustered	No. non-clustered and in subset over total non-clustered	pvalue (two sided Fisher's exact test)	pvalue (Benjamini & Hochberg adjusted)	significant (adjusted pvalue <= 0.05)
Pezizomycotina	Duplicated	2689	63772	192	7449	0.933356	0.89541	4.35619e-12	1.744e-11	over
Pezizomycotina	Transferred	191	2849	2690	68372	0.0662964	0.0400022	1.04149e-10	2.77333e-10	over
Saccaromycotina	Duplicated	869	24410	123	2717	0.876008	0.899841	0.0180994	0.0241325	under
Saccaromycotina	Transferred	14	477	978	26650	0.0141129	0.017584	0.535604	0.535604
Agaricomycetes	Duplicated	545	32870	58	2311	0.903814	0.934311	0.00477919	0.0076467	under
Agaricomycetes	Transferred	24	1019	579	34162	0.039801	0.0289645	0.140612	0.1607
Fungi	Duplicated	4443	136638	506	18495	0.897757	0.88078	0.000228876	0.000457752	over
Fungi	Transferred	237	4469	4712	150664	0.0478885	0.0288075	5.01912e-13	4.016e-12	over
